# Supplementary material
Source: PubMed Central journal article supplement (PMC2796563)
Supplement: NIHMS162219-supplement-Supplementary_Data.pdf [file NIHMS162219-supplement-Supplementary_Data.pdf]

Appendix A.

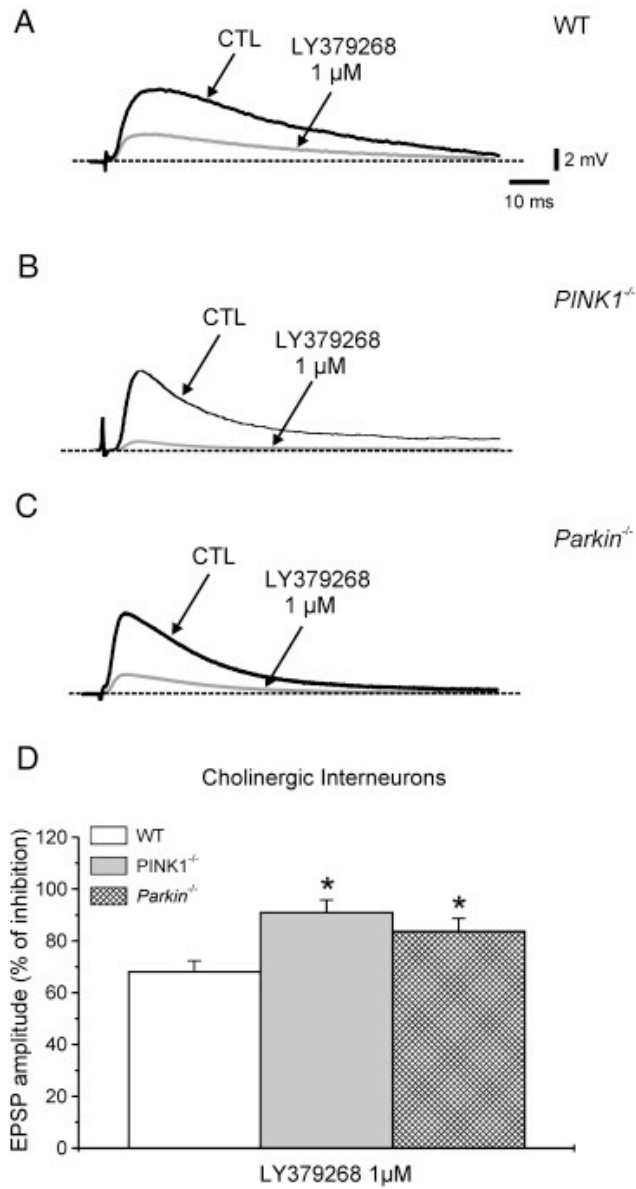

Fig. S1. Effect of LY379268 on striatal cholinergic interneurons. A. Sample traces of glutamate-mediated EPSPs recorded from a WT cholinergic interneurons. The superimposed trace shows the inhibitory effect of LY379268 (1 μM). The efficacy of LY379268 was significantly higher both in *PINK1*<sup>-/-</sup> and *Parkin*<sup>-/-</sup> mice (B, C). D. The plot summarizes the inhibitory effects of LY379268 in the three strains of mice. Asterisk =  $p < 0.05$  (one-way ANOVA, followed by post-hoc Tukey-test).
